# Supplementary material for: A framework for parameter estimation, sensitivity analysis, and uncertainty analysis for holistic hydrologic modeling using SWAT+
Source: Copernicus journal article supplement (doi:10.5194/hess-28-21-2024), 2024-01-02
Supplement: Supplementary file 1 [file hess-28-21-2024-supplement.pdf]

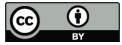

*Supplement of*

**A framework for parameter estimation, sensitivity analysis, and uncertainty analysis for holistic hydrologic modeling using SWAT+**

**Salam A. Abbas et al.**

*Correspondence to:* Salam A. Abbas ([salam.a.abbas@colostate.edu](mailto:salam.a.abbas@colostate.edu))

The copyright of individual parts of the supplement might differ from the article licence.

## Supporting Information

**Table S1.** Description and hydrological process of 23 selected parameters for the standalone SWAT+ model.

| Parameters  | Description                                                                       | Hydrologic Processes                                      |
|-------------|-----------------------------------------------------------------------------------|-----------------------------------------------------------|
| CN2 #       | SCS runoff curve number for moisture condition II                                 | Surface runoff processes (cn)                             |
| ESCO #      | Soil evaporation compensation factor                                              | Potential and actual evapotranspiration processes (hydro) |
| EPCO #      | Plant uptake compensation factor                                                  |                                                           |
| gw_flo #    | Initial depth of water in the shallow aquifer (mm H <sub>2</sub> O)               | Groundwater flow processes (aqu)                          |
| dep_bot #   | Initial depth of water in the deep aquifer (mm H <sub>2</sub> O)                  |                                                           |
| dep_wt #    | Initial groundwater height (m)                                                    |                                                           |
| flo_max #   | The delay time                                                                    |                                                           |
| alpha_bf #  | Baseflow alpha factor (1/days)                                                    |                                                           |
| revap #     | Groundwater "revap" coefficient                                                   |                                                           |
| rchg_dp #   | Deep aquifer percolation fraction                                                 |                                                           |
| spec_yld #  | Specific yield of the shallow aquifer (m <sup>3</sup> /m <sup>3</sup> )           |                                                           |
| revap_min # | Threshold depth of water in the shallow aquifer for "revap" (mm H <sub>2</sub> O) |                                                           |
| Ftmp        | Snowfall temperature (°C)                                                         |                                                           |
| Mtmp        | Snowmelt base temperature (°C)                                                    |                                                           |
| Mmax        | Melt factor for snow on June 21 (mm H <sub>2</sub> O/°C– day)                     |                                                           |
| Mmin        | Melt factor for snow on December 21 (mm H <sub>2</sub> O/°C– day)                 |                                                           |
| Tmplag      | Snowpack temperature lag factor                                                   |                                                           |
| Snowd       | Minimum snow water content (mm H <sub>2</sub> O)                                  |                                                           |
| COV50       | Fraction of COVMX                                                                 |                                                           |
| perco #     | Percolation coefficient                                                           | Soil water processes (sol)                                |
| SOL_AWC ()  | Available water capacity of the soil layer (mm H <sub>2</sub> O/mm soil)          |                                                           |
| SOL_BD ()   | Moist bulk density (g/cm <sup>3</sup> or Mg/m <sup>3</sup> )                      |                                                           |
| SOL_K ()    | Saturated hydraulic conductivity (mm/h)                                           |                                                           |

**Table S2.** Monthly streamflow performance statistics for the base SWAT+ simulations.

| River Basin               | Station       | Calibration |                |       |      | Validation              |                |       |      |
|---------------------------|---------------|-------------|----------------|-------|------|-------------------------|----------------|-------|------|
|                           |               | NSE         | R <sup>2</sup> | PBIAS | KGE  | NSE                     | R <sup>2</sup> | PBIAS | KGE  |
| Nanticoke River           | USGS 01488500 | 0.67        | 0.73           | 19.60 | 0.68 | 0.78                    | 0.79           | 7.10  | 0.78 |
|                           | USGS 01487000 | 0.72        | 0.78           | 16.00 | 0.77 | 0.66                    | 0.67           | 6.80  | 0.72 |
| Winnepago River           | USGS 05459500 | 0.89        | 0.89           | -0.60 | 0.93 | 0.82                    | 0.87           | 15.20 | 0.71 |
| Cache River               | USGS 07077380 | 0.81        | 0.81           | -7.20 | 0.82 | 0.71                    | 0.72           | 6.10  | 0.77 |
|                           | USGS 07077700 | 0.68        | 0.74           | 14.70 | 0.61 | Not enough observations | 0.88           | 7.70  | 0.64 |
|                           | USGS 07077555 | 0.78        | 0.85           | -0.70 | 0.66 |                         |                |       |      |
| Arkansas Headwaters River | USGS 07087050 | 0.62        | 0.76           | 30.60 | 0.59 | 0.66                    | 0.83           | 31.40 | 0.54 |
|                           | USGS 07091200 | 0.62        | 0.79           | 30.20 | 0.63 | 0.61                    | 0.79           | 32.60 | 0.53 |
|                           | USGS 07094500 | 0.64        | 0.66           | 9.40  | 0.76 | 0.50                    | 0.53           | 12.40 | 0.63 |
|                           | USGS 07096000 | 0.65        | 0.67           | 4.70  | 0.80 | 0.54                    | 0.56           | 10.80 | 0.69 |

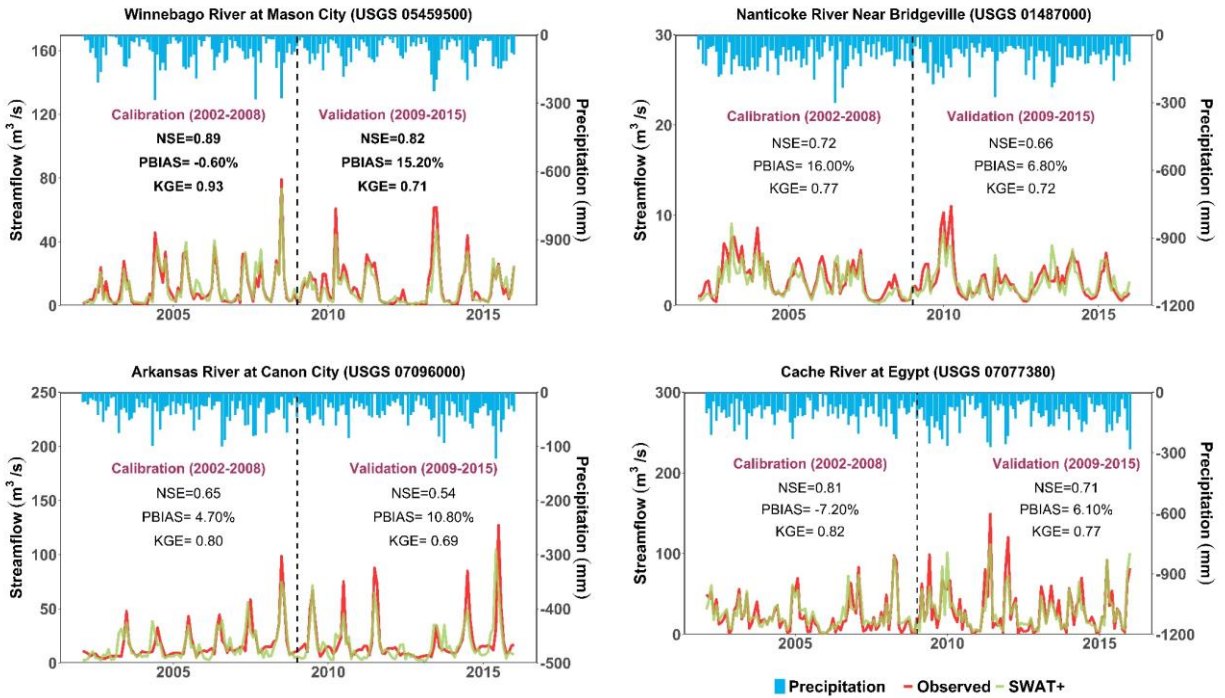

**Figure S1.** Measured and simulated monthly streamflow for SWAT+ models for selected USGS stream gaging sites within the four study watersheds. Performance statistics (NSE, PBIAS, KGE) are shown for each gage site.

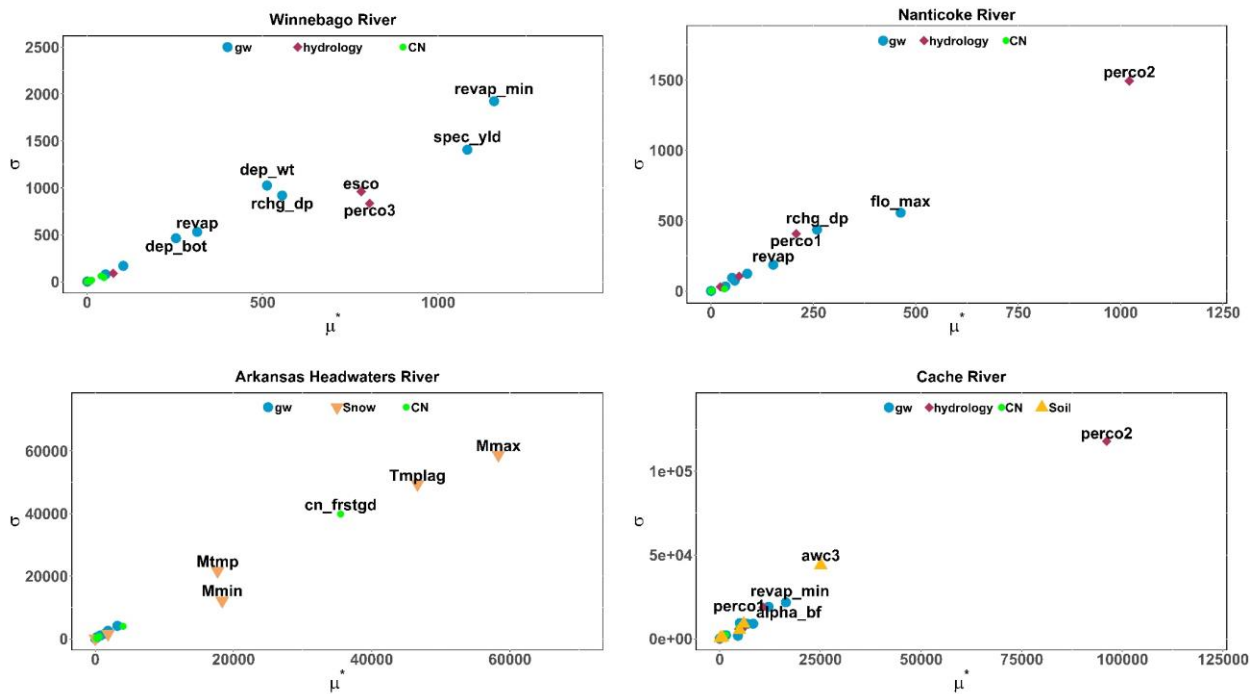

**Figure S2.** Parameters sensitivity analysis based on the Morris screening method for minimizing streamflow for base SWAT+. Only the most sensitive parameters are labelled.  $\mu^*$  is the sensitivity measure, and  $\sigma$  reveals the degree of nonlinearity or factor interaction.

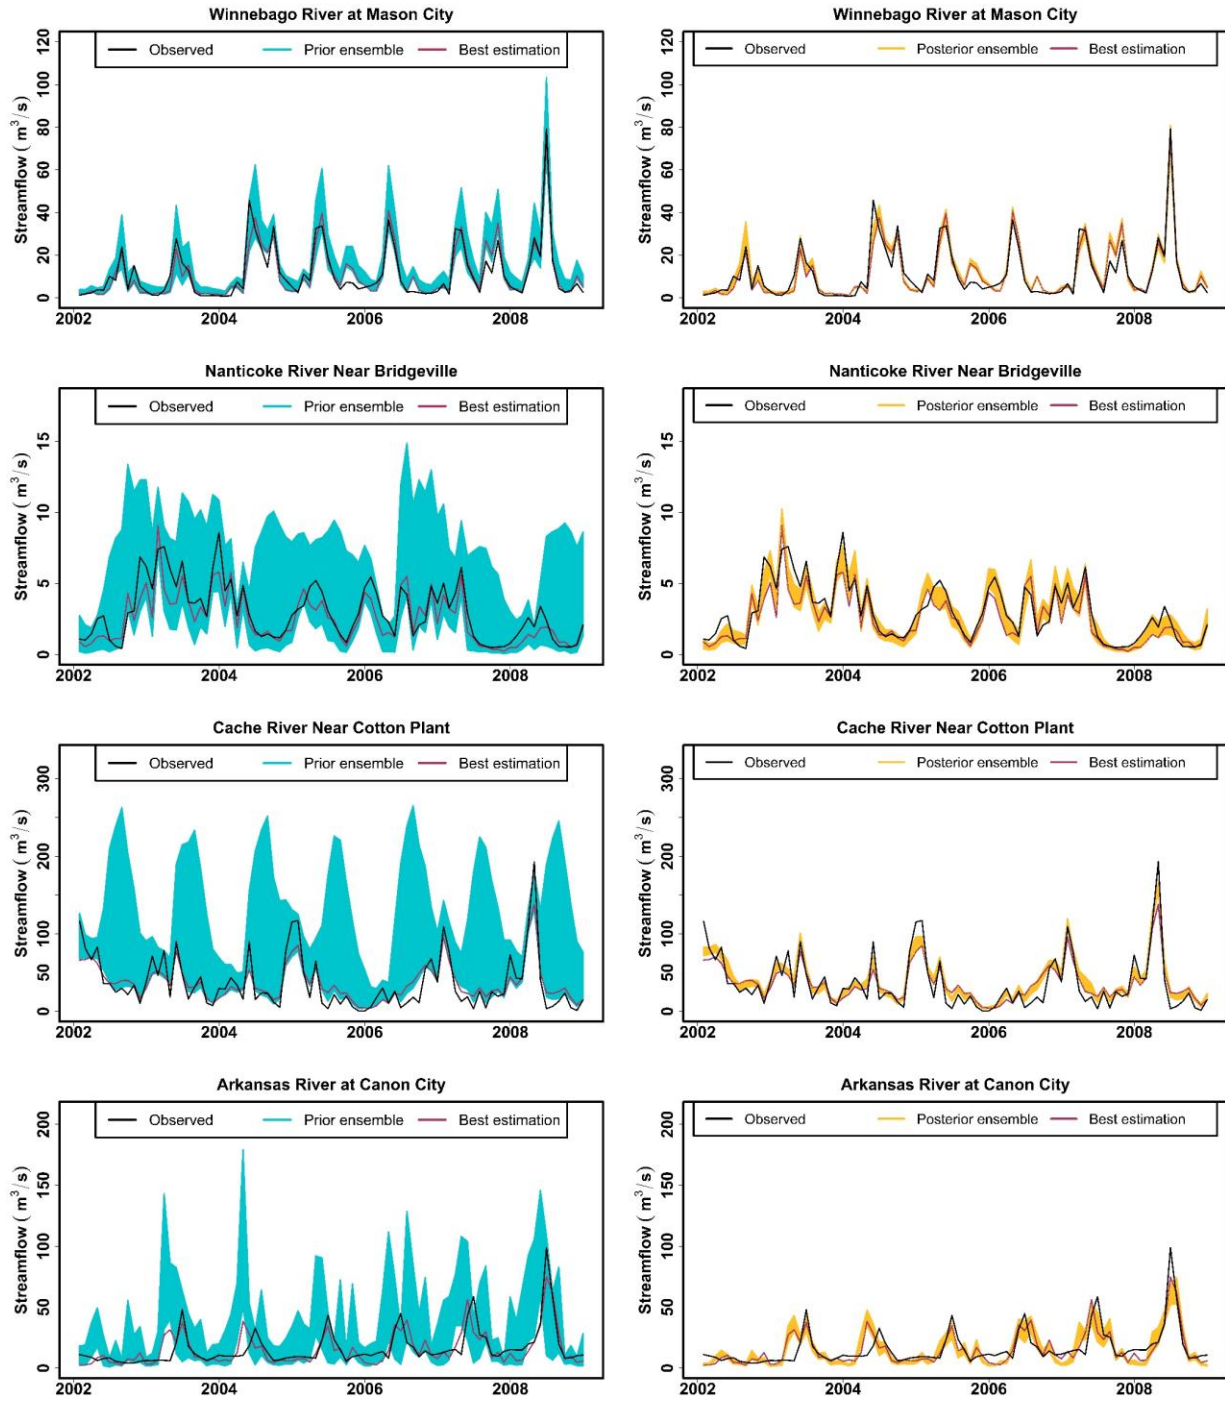

**Figure S3.** Prior (left column) and Posterior (right column) prediction uncertainty bounds for streamflow estimation using SWAT+ in four study watersheds.
